# Supplementary material for: Generation of Red-Shifted Cameleons for Imaging Ca2+ Dynamics of the Endoplasmic Reticulum
Source: PubMed Central journal article supplement (PMC4507692; doi:10.3390/s150613052), 2015-06-04
Supplement: sensors-15-13052-s001.pdf [file sensors-15-13052-s001.pdf]

*Supplementary Information*

## **Generation of Red-Shifted Cameleons for Imaging Ca<sup>2+</sup> Dynamics of the Endoplasmic Reticulum. *Sensors* 2015, 15, 13052-13068**

**Markus Waldeck-Weiermair \***, Helmut Bischof, Sandra Blass, Andras T. Deak, Christiane Klec, Thomas Graier, Clara Roller, Rene Rost, Emrah Eroglu, Benjamin Gottschalk, Nicole A. Hofmann, Wolfgang F. Graier and Roland Malli

Institute of Molecular Biology and Biochemistry, Centre of Molecular Medicine, Medical University of Graz, Harrachgasse 21, 8010 Graz, Austria;

E-Mails: bischof.helmut@gmail.com (H.B.); sandra.blass@medunigraz.at (S.B.);

andras.deak@medunigraz.at; (A.T.D.); christiane.klec@medunigraz.at (C.K.);

thomas.graier@medunigraz.at (T.G.); clara.roller@gmx.at (C.R.); rene.rost@medunigraz.at (R.R.);

emrah.eroglu@medunigraz.at (E.E.); benjamin.gottschalk@medunigraz.at (B.G.);

nicole.hofmann@medunigraz.at (N.A.H.); wolfgang.graier@medunigraz.at (W.F.G.);

roland.malli@medunigraz.at (R.M.)

\* Author to whom correspondence should be addressed: markus.weiermair@medunigraz.at;  
Tel.: +43-316-380-7562; Fax: +43-316-380-9615.

---

**Table S1.** List of primers and restriction sites for engineering red-shifted cameleons.

| Constructs                                 | Gene                               | Orientation                           | Primer Pairs                                                                                                                                                   | Restriction Sites |
|--------------------------------------------|------------------------------------|---------------------------------------|----------------------------------------------------------------------------------------------------------------------------------------------------------------|-------------------|
| All ER targeted                            | ER Signal sequence of Calreticulin | N-terminal of all ER targeted sensors | Sense strand: 5'-CTAGCATGCTGCTGCCCCGTCCCCCTGCTGCTGGGCCTGCTGGGCGCCGCCGCGAC-3'<br>Antisense strand: 5'-GTACGACGACGGGCAGGGGGACGACGACCCGGACGACCCGCGGCGGGCTGAGCT-3' | NheI/XhoI         |
| D1ERGR, D1ERGM2                            | EGFP                               | N-terminal                            | Forward: 5'-AATCTCGAGTATGGTGAGCAAGGGCGAGGA-3'<br>Reverse: 5'-GCCATCGATCTTGTACAGCTCGTCCATGC-3'                                                                  | XhoI/Clal         |
| D1ERGO-Cam2, D1ERRG-Cam2, D1ERTG, D1ERmR2G | EGFP <sub>KDEL</sub>               | C-terminal                            | Forward: 5'-CGGGAATTCATGGTGAGCAAGGGCGAGGA-3'<br>Reverse: 5'-GCAAGCTTACAGCTCGTCCTTGTACAGCTCGTCCATGC-3'                                                          | EcoRI/HindIII     |
| D1ERRG-Cam1, D1ERRG-Cam2, D1ERRC           | TagRFP                             | N-terminal                            | Forward: 5'-GGCTCGAGTATGGTGTCTAAGGGCGAAGAG-3'<br>Reverse: 5'-GGATCGATATTAAGTTTGTGCCCCAGTTTGC-3'                                                                | XhoI/Clal         |
| D1ERGR, D1ERCRCR                           | TagRFP <sub>KDEL</sub>             | C-terminal                            | Forward: 5'-TCGGAATTCATGGTGTCTAAGGGCGAAGAG-3'<br>Reverse: 5'-GCGAAGCTTACAGCTCGTCCTTATTAAGTT TGTGCCCCAG-3'                                                      | EcoRI/HindIII     |
| D1ERTG                                     | tdTomato                           | N-terminal                            | Forward: 5'-AATCTCGAGTATGGTGAGCAAGGGCGAGGA-3'<br>Reverse: 5'-CGAATCGATCTTGTACAGCTCGTCCATGC-3'                                                                  | XhoI/Clal         |
| D1ERCRCR, D1ERCmR2, D1CmR2, mtD1CmR2       | Clover                             | N-terminal                            | Forward: 5'-AATCTCGAGTATGGTGAGCAAGGGCGAGGA-3'<br>Reverse: 5'-AGAATCGATAGCTCGAGATCTGAGTCCGGC-3'                                                                 | XhoI/Clal         |
| D1ERRC, D1ERmR2C                           | Clover <sub>KDEL</sub>             | C-terminal                            | Forward: 5'-AGGGAATTCATGGTGAGCAAGGGCGAGGAG-3'<br>Reverse: 5'-AGCAAGCTTACAATTCGTCTTAGCTCGAGATCTGAGTCCGGC-3'                                                     | EcoRI/HindIII     |
| D1ERmR2G, D1ERmR2C                         | mRuby2                             | N-terminal                            | Forward: 5'-ACTCTCGAGTATGGTGTCTAAGGGCGAAGAGC-3'<br>Reverse: 5'-AGCATCGATCTTGTACAGCTCGTCCATCCCAC-3'                                                             | XhoI/Clal         |
| D1ERGM2, D1ERCmR2                          | mRuby2 <sub>KDEL</sub>             | C-terminal                            | Forward: 5'-AGCGAATTCATGGTGTCTAAGGGCGAAGAGC-3'<br>Reverse: 5'-GACAAGCTTACAGCTCGTCCTTCTTGTACA GCTCGTCCATCC-3'                                                   | EcoRI/HindIII     |
| D1CmR2, mtD1CmR2                           | mRuby2                             | C-terminal                            | Forward: 5'-AGCGAATTCATGGTGTCTAAGGGCGAAGAGC-3'<br>Reverse: 5'-GCCAAGCTTACTTGTACAGCTCGTCCATCC-3'                                                                | EcoRI/HindIII     |

**Table S2.** Properties of fluorescent proteins.

| Colour | Protein   | Length | $\lambda_{Exc}(nm)$ | $\lambda_{Em}(nm)$ | Brightness * | Photostability | pKA | Ref.  |
|--------|-----------|--------|---------------------|--------------------|--------------|----------------|-----|-------|
| Cyan   | ECFP      | 238    | 435                 | 478                | 13           | 64             | 5.5 | [1]   |
| Yellow | Citrine   | 238    | 516                 | 529                | 59           | 49             | 5.7 | [2]   |
| Green  | EGFP      | 238    | 488                 | 507                | 34           | 174            | 6.0 | [2]   |
|        | Clover    | 232    | 505                 | 515                | 84           | 50             | 6.1 | [3]   |
| Orange | mKO       | 217    | 548                 | 559                | 31           | 122            | 5.0 | [1]   |
| Red    | TagRFP    | 237    | 555                 | 515                | 48           | 48             | 3.8 | [4]   |
|        | Td-tomato | 476    | 554                 | 581                | 95           | 98             | 4.7 | [2,4] |
|        | mRuby2    | 238    | 559                 | 600                | 43           | 123            | 5.3 | [3]   |

\* Brightness: Molar Extinction Coefficient  $\times$  Fluorescence Quantum Yield/1000.

## References

1. Karasawa, S.; Araki, T.; Nagai, T.; Mizuno, H.; Miyawaki, A. Cyan-Emitting and Orange-Emitting Fluorescent Proteins as a Donor/Acceptor Pair for Fluorescence Resonance Energy Transfer. *Biochem. J.* **2004**, *381*, 307–312.
2. Shaner, N.C.; Steinbach, P.A.; Tsien, R.Y. A Guide to Choosing Fluorescent Proteins. *Nat. Methods* **2005**, *2*, 905–909.
3. Lam, A.J.; St-Pierre, F.; Gong, Y.; Marshall, J.D.; Cranfill, P.J.; Baird, M.A.; McKeown, M.R.; Wiedenmann, J.; Davidson, M.W.; Schnitzer, M.J.; *et al.* Improving FRET Dynamic Range with Bright Green and Red Fluorescent Proteins. *Nat. Methods* **2012**, *9*, 1005–1012.
4. Shaner, N.C.; Lin, M.Z.; McKeown, M.R.; Steinbach, P.A.; Hazelwood, K.L.; Davidson, M.W.; Tsien, R.Y. Improving the Photostability of Bright Monomeric Orange and Red Fluorescent Proteins. *Nat. Methods* **2008**, *5*, 545–551.

© 2015 by the authors; licensee MDPI, Basel, Switzerland. This article is an open access article distributed under the terms and conditions of the Creative Commons Attribution license (<http://creativecommons.org/licenses/by/4.0/>).
